# Supplementary material for: Multi-Scenario Simulation and Eco-Environmental Effects Analysis of Land Use/Cover Change in China by an Integrated Cellular Automata and Markov Model
Source: MDPI journal article supplement (doi:10.3390/land13040520), 2024-04-14
Supplement: s1 [file s1]

**Supplementary material to:**

**Multi-Scenario Simulation and Eco-Environmental Effects Analysis of Land Use/Cover Change in China by an Integrated Cellular Automata and Markov Model**

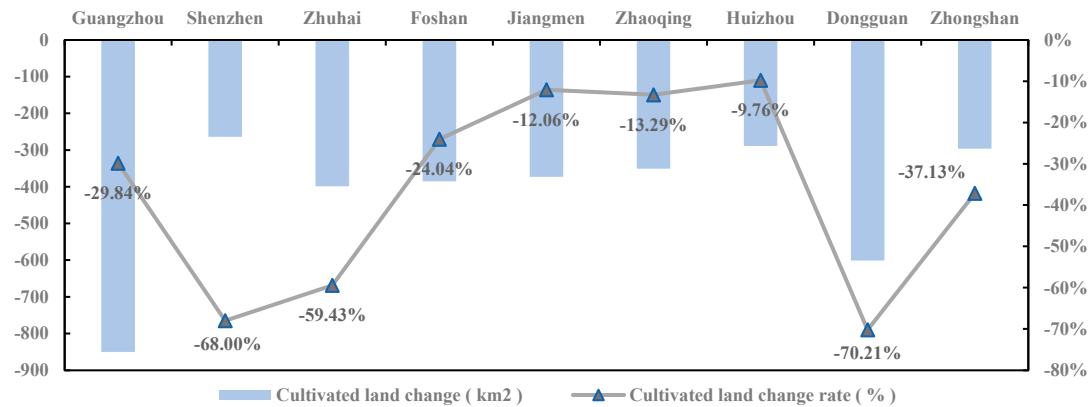

**Figure S1. Change of cultivated land area in the cities of the PRD from 1990 to 2020**

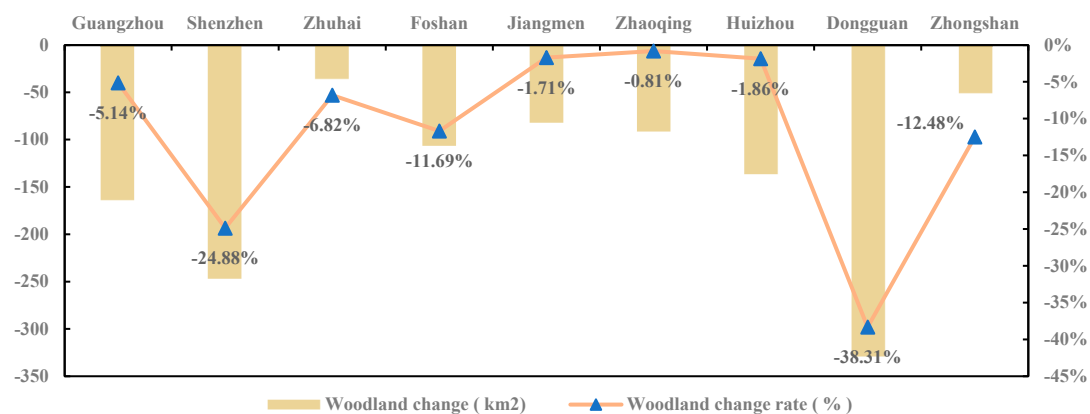

**Figure S2. Change of woodland area in the cities of the PRD from 1990 to 2020**

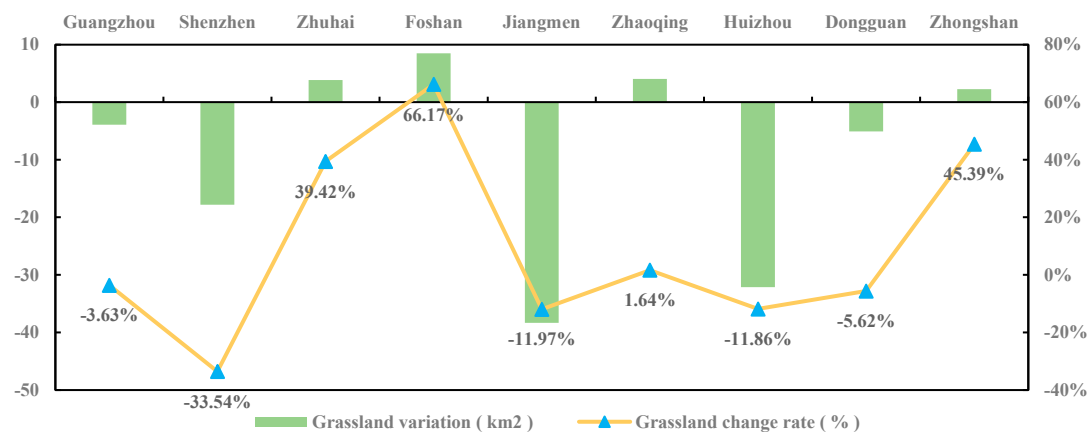

**Figure S3. Change of grassland area in the cities of the PRD from 1990 to 2020**

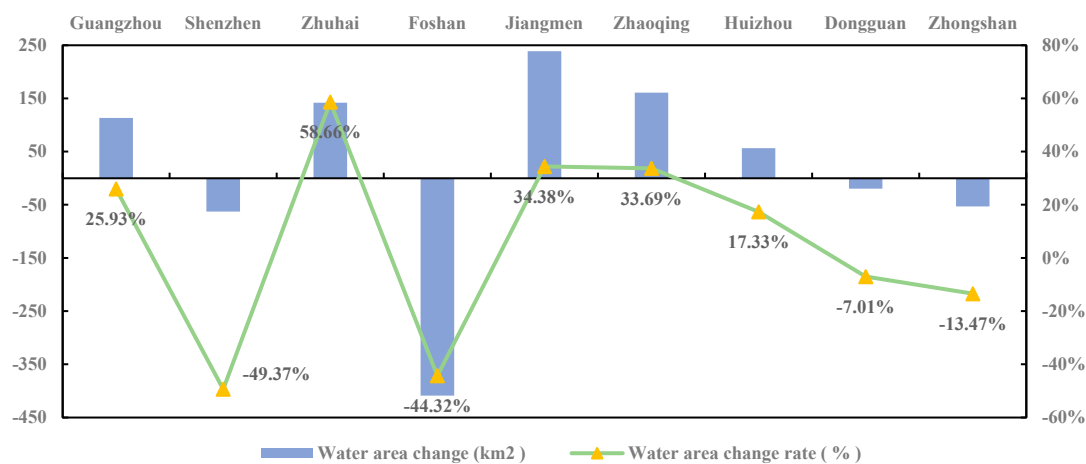

**Figure S4. Change of construction land area in the cities of the PRD from 1990 to 2020**

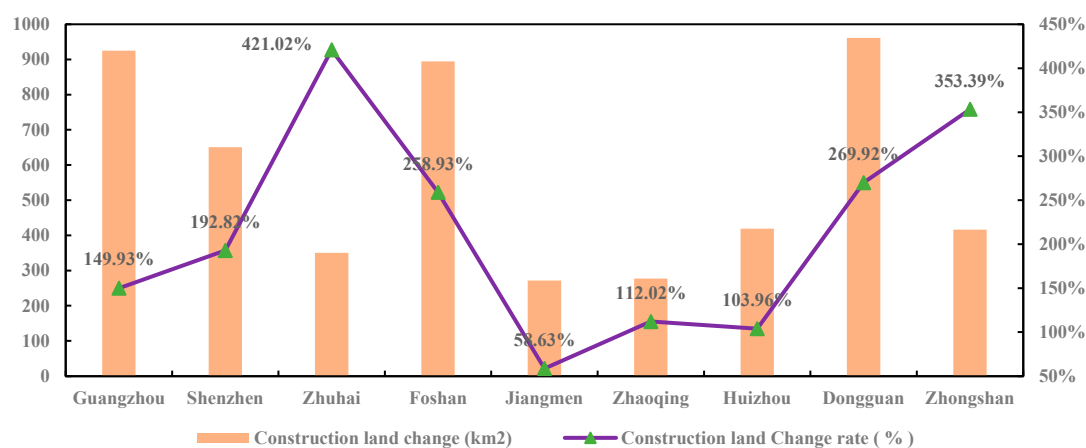

**Figure S5. Change of water area in the cities of the PRD from 1990 to 2020**

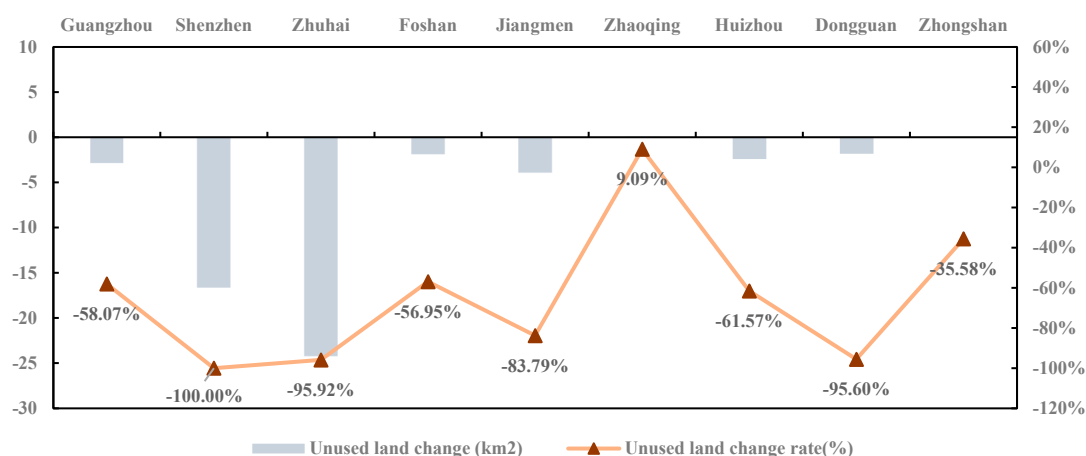

**Figure S6. Change of unused land in the cities of the PRD from 1990 to 2020**

**Table S1.** The main secondary land use transformation and its ecological contribution rate affecting the ecological environment quality in the PRD from 1990 to 2000

| Pattern                                                                    | Secondary land use type change                                        | Change area<br>/ km <sup>2</sup> | Ecological<br>contribution rate<br>(%) |
|----------------------------------------------------------------------------|-----------------------------------------------------------------------|----------------------------------|----------------------------------------|
| Lead to the<br>improvement<br>of ecological<br>environment<br>quality      | Paddy field - Reservoir pond                                          | 685.24                           | 0.316%                                 |
|                                                                            | Sparse woodland - Forest land                                         | 64.26                            | 0.059%                                 |
|                                                                            | Other woodlands - Forest land                                         | 47.98                            | 0.049%                                 |
|                                                                            | Dry land - Reservoir pond                                             | 38.57                            | 0.021%                                 |
|                                                                            | Foreshore - Reservoir pond                                            | 69.54                            | 0.013%                                 |
|                                                                            | Dry land - Forest land                                                | 7.20                             | 0.009%                                 |
|                                                                            | Shoaly land - Reservoir pond                                          | 30.70                            | 0.006%                                 |
|                                                                            | Marine, reclamation or other unused<br>land - Urban land              | 14.35                            | 0.005%                                 |
|                                                                            | High coverage grassland - Forest land                                 | 10.66                            | 0.004%                                 |
|                                                                            | Marine, reclamation or other unused<br>land - Other construction land | 13.23                            | 0.003%                                 |
| Leading to the<br>deterioration of<br>ecological<br>environment<br>quality | Forest land - Other woodlands                                         | 163.01                           | -0.165%                                |
|                                                                            | Shrub land - Urban land                                               | 84.96                            | -0.071%                                |
|                                                                            | Forest land - Urban land                                              | 37.71                            | -0.052%                                |
|                                                                            | Forest land - Sparse woodland                                         | 55.27                            | -0.051%                                |
|                                                                            | Paddy field - Rural settlements                                       | 264.70                           | -0.049%                                |
|                                                                            | Paddy field - Urban land                                              | 258.68                           | -0.048%                                |
|                                                                            | Reservoir pond - Urban land                                           | 46.62                            | -0.030%                                |
|                                                                            | Reservoir pond - Rural settlements                                    | 40.12                            | -0.026%                                |
|                                                                            | Forest land - Dry land                                                | 19.32                            | -0.025%                                |
|                                                                            | Forest land - Rural settlements                                       | 17.72                            | -0.025%                                |

**Table S2.** The main secondary land use transformation and its ecological contribution rate affecting the ecological environment quality in the PRD from 2000 to 2010

| Pattern                                                                    | Secondary land use type change           | Change area<br>/ km <sup>2</sup> | Ecological<br>contribution rate<br>(%) |
|----------------------------------------------------------------------------|------------------------------------------|----------------------------------|----------------------------------------|
| Lead to the<br>improvement<br>of ecological<br>environment<br>quality      | Other woodlands - Forest land            | 427.58                           | 0.433%                                 |
|                                                                            | Paddy field - Reservoir pond             | 523.47                           | 0.241%                                 |
|                                                                            | Dry land - Forest land                   | 53.41                            | 0.069%                                 |
|                                                                            | Sparse woodland - Forest land            | 57.60                            | 0.053%                                 |
|                                                                            | Dry land - Reservoir pond                | 92.79                            | 0.051%                                 |
|                                                                            | Paddy field - Forest land                | 41.16                            | 0.049%                                 |
|                                                                            | Urban land - Forest land                 | 26.71                            | 0.037%                                 |
|                                                                            | Rural settlements - Forest land          | 15.68                            | 0.022%                                 |
|                                                                            | Other construction land - Reservoir pond | 23.68                            | 0.017%                                 |
|                                                                            | Other construction land - Forest land    | 9.82                             | 0.014%                                 |
| Leading to the<br>deterioration of<br>ecological<br>environment<br>quality | Forest land - Other woodlands            | 693.47                           | -0.702%                                |
|                                                                            | Paddy field - Urban land                 | 631.78                           | -0.116%                                |
|                                                                            | Reservoir pond - Paddy field             | 508.85                           | -0.234%                                |
|                                                                            | Dry land - Urban land                    | 415.08                           | -0.038%                                |
|                                                                            | Paddy field - Other construction land    | 359.70                           | -0.099%                                |
|                                                                            | Reservoir pond - Urban land              | 304.38                           | -0.196%                                |
|                                                                            | Other woodlands - Urban land             | 174.07                           | -0.064%                                |
|                                                                            | Paddy field - Rural settlements          | 169.92                           | -0.031%                                |
|                                                                            | Forest land - Other construction land    | 163.79                           | -0.241%                                |
|                                                                            | Reservoir pond - Other construction land | 160.11                           | -0.118%                                |

**Table S3.** The main secondary land use transformation and its ecological contribution rate affecting the ecological environment quality in the PRD from 2010 to 2020

| Pattern                                                                    | Secondary land use type change                      | Change area<br>/ km <sup>2</sup> | Ecological<br>contribution rate<br>(%) |
|----------------------------------------------------------------------------|-----------------------------------------------------|----------------------------------|----------------------------------------|
| Lead to the<br>improvement<br>of ecological<br>environment<br>quality      | Paddy field - Forest land                           | 107.51                           | 0.129%                                 |
|                                                                            | Other woodlands - Forest land                       | 104.86                           | 0.106%                                 |
|                                                                            | Dry land - Forest land                              | 62.47                            | 0.080%                                 |
|                                                                            | Other construction land - Forest land               | 42.84                            | 0.063%                                 |
|                                                                            | Paddy field - Reservoir pond                        | 111.28                           | 0.051%                                 |
|                                                                            | Other construction land -High coverage<br>grassland | 46.07                            | 0.051%                                 |
|                                                                            | Rural settlements - Forest land                     | 30.51                            | 0.042%                                 |
|                                                                            | Urban land - Forest land                            | 30.26                            | 0.042%                                 |
|                                                                            | Sparse woodland - Forest land                       | 40.89                            | 0.038%                                 |
|                                                                            | Other construction land - Reservoir pond            | 45.86                            | 0.034%                                 |
| Leading to the<br>deterioration of<br>ecological<br>environment<br>quality | Forest land - Other construction land               | 147.34                           | -0.217%                                |
|                                                                            | Forest land - Paddy field                           | 113.88                           | -0.136%                                |
|                                                                            | Reservoir pond - Other construction land            | 175.19                           | -0.129%                                |
|                                                                            | Paddy field - Other construction land               | 334.86                           | -0.092%                                |
|                                                                            | Forest land - Dry land                              | 69.48                            | -0.089%                                |
|                                                                            | Forest land - Urban land                            | 58.05                            | -0.080%                                |
|                                                                            | Forest land - Other woodlands                       | 53.54                            | -0.054%                                |
|                                                                            | Forest land - Sparse woodland                       | 52.74                            | -0.048%                                |
|                                                                            | Forest land - Reservoir pond                        | 52.39                            | -0.039%                                |
|                                                                            | Reservoir pond - Urban land                         | 58.90                            | -0.038%                                |
