# Supplementary material for: Multi-Scenario Simulation and Eco-Environmental Effects Analysis of Land Use/Cover Change in China by an Integrated Cellular Automata and Markov Model
Source: MDPI journal article supplement (doi:10.3390/land13040520), 2024-04-14
Supplement: s1 [file s1]

Archive with 1 entries (1 files):
- land-2934873-supplementary.pdf
